# Supplementary material for: Liraglutide Effectiveness in Type 2 Diabetes: Insights from a Real-World Cohort of Portuguese Patients
Source: MDPI journal article supplement (doi:10.3390/metabo12111121), 2022-11-16
Supplement: s1 [file s1]

## **Supplementary Material**

Supplementary materials to this manuscript include patient's concomitant medication at baseline and at 6, 12, and 24 months (Table S1), univariate (Table S2) and multivariate (Table S3) analyses of factors predicting an HbA1c reduction of at least 1%, and the number of patients who achieved 3% or 5% weight loss at 6, 12, and 24 months vs. baseline (Table S4).

**Table S1.** Patients' concomitant medication (*n*/N [%]) at baseline and at 6, 12, and 24 months.

|                                     | Baseline        | 6 months        | 12 months       | 24 months       | <i>p</i> -values                                               |
|-------------------------------------|-----------------|-----------------|-----------------|-----------------|----------------------------------------------------------------|
| <b>Anti-diabetic medication</b>     |                 |                 |                 |                 |                                                                |
| Metformin                           | 167/191 (87.4%) | 156/185 (84.3%) | 163/191 (85.3%) | 117/139 (84.2%) | 0.364 <sup>1</sup><br>1.000 <sup>2</sup><br>1.000 <sup>3</sup> |
| Sulphonylureas                      | 43/191 (22.5%)  | 23/184 (12.5%)  | 27/191 (14.1%)  | 16/133 (12.0%)  | 0.001 <sup>1</sup><br>0.010 <sup>2</sup><br>0.026 <sup>3</sup> |
| Acarbose                            | 19/191 (9.9%)   | 11/184 (6.0%)   | 12/191 (6.3%)   | 11/138 (8.0%)   | 0.040 <sup>1</sup><br>0.137 <sup>2</sup><br>0.392 <sup>3</sup> |
| Pioglitazone                        | 6/191 (3.1%)    | 2/183 (1.1%)    | 3/191 (1.6%)    | 2/135 (1.5%)    | 0.401 <sup>1</sup><br>1.000 <sup>2</sup><br>0.401 <sup>3</sup> |
| DPP4i                               | 121/191 (63.4%) | 10/185 (5.4%)   | 10/191 (5.2%)   | 10/137 (7.3%)   | 0.000 <sup>1</sup><br>0.000 <sup>2</sup><br>0.000 <sup>3</sup> |
| Dapagliflozin                       | 7/191 (3.7%)    | 9/185 (4.9%)    | 16/191 (8.4%)   | 22/137 (16.1%)  | 1.000 <sup>1</sup><br>0.080 <sup>2</sup><br>0.000 <sup>3</sup> |
| Insulin                             | 108/191 (56.5%) | 102/185 (55.1%) | 109/191 (57.1%) | 88/138 (63.8%)  | 1.000 <sup>1</sup><br>1.000 <sup>2</sup><br>0.364 <sup>3</sup> |
| <b>Anti-hypertensive medication</b> |                 |                 |                 |                 |                                                                |
| ACE inhibitors                      | 44/191 (23.0%)  | 47/184 (25.5%)  | 47/191 (24.6%)  | 34/135 (25.2%)  | 1.000 <sup>1</sup><br>1.000 <sup>2</sup><br>1.000 <sup>3</sup> |
| ARB                                 | 98/191 (51.3%)  | 94/185 (50.8%)  | 103/191 (53.9%) | 75/137 (54.7%)  | 1.000 <sup>1</sup><br>0.683 <sup>2</sup><br>0.996 <sup>3</sup> |
| Alpha/Beta-blockers                 | 58/191 (30.4%)  | 56/184 (30.4%)  | 58/191 (30.4%)  | 47/135 (34.8%)  | 1.000 <sup>1</sup><br>1.000 <sup>2</sup><br>1.000 <sup>3</sup> |
| Calcium channel blockers            | 71/191 (37.2%)  | 69/185 (37.3%)  | 71/191 (37.2%)  | 56/133 (42.1%)  | 1.000 <sup>1</sup><br>1.000 <sup>2</sup><br>1.000 <sup>3</sup> |
| Renin inhibitors                    | 1/191 (0.5%)    | 0/184 (0.0%)    | 0/191 (0.0%)    | 0/135 (0.0%)    | NA <sup>1</sup><br>NA <sup>2</sup><br>NA <sup>3</sup>          |
| <b>Diuretic medication</b>          |                 |                 |                 |                 |                                                                |
| Diuretic                            | 106/191 (55.5%) | 106/185 (57.3%) | 109/191 (57.1%) | 79/136 (58.1%)  | 1.000 <sup>1</sup><br>1.000 <sup>2</sup><br>1.000 <sup>3</sup> |
| Aldosterone antagonists             | 9/191 (4.7%)    | 8/182 (4.4%)    | 8/191 (4.2%)    | 6/136 (4.4%)    | 1.000 <sup>1</sup><br>1.000 <sup>2</sup><br>NA <sup>3</sup>    |

| Anti-dyslipidaemia medication |                 |                 |                 |                 |                    |
|-------------------------------|-----------------|-----------------|-----------------|-----------------|--------------------|
|                               |                 |                 |                 |                 | 0.010 <sup>1</sup> |
| Statins                       | 142/191 (74.3%) | 148/183 (80.9%) | 150/191 (78.5%) | 114/135 (84.4%) | 0.459 <sup>2</sup> |
|                               |                 |                 |                 |                 | 0.026 <sup>3</sup> |
|                               |                 |                 |                 |                 | 1.000 <sup>1</sup> |
| Fibrates                      | 36/191 (18.8%)  | 35/183 (19.1%)  | 39/191 (20.4%)  | 32/134 (23.9%)  | 1.000 <sup>2</sup> |
|                               |                 |                 |                 |                 | 0.081 <sup>3</sup> |
|                               |                 |                 |                 |                 | 0.392 <sup>1</sup> |
| Ezetimibe                     | 18/191 (9.4%)   | 22/184 (12.0%)  | 23/191 (12.0%)  | 16/132 (12.1%)  | 0.802 <sup>2</sup> |
|                               |                 |                 |                 |                 | 0.231 <sup>3</sup> |

ACE; angiotensin-converting enzyme; ARB, angiotensin receptor blocker; DPP4i: Dipeptidyl-peptidase 4 inhibitors. .

For multiple comparisons between baseline and the <sup>1</sup> 6, <sup>2</sup> 12, and <sup>3</sup> 24 months visits, the *p* value was adjusted by the Bonferroni's method.

**Table S2.** Univariate analysis of factors predicting an HbA1c reduction of at least 1%.

| Predictors                     | Beta    | SE     | z      | p-Value | OR     | LL-95%CI | UL-95%CI |
|--------------------------------|---------|--------|--------|---------|--------|----------|----------|
| Age                            | 0.0275  | 0.0161 | 1.700  | 0.089   | 1.028  | 0.996    | 1.061    |
| Disease duration               | 0.0166  | 0.0194 | 0.856  | 0.392   | 1.017  | 0.979    | 1.056    |
| BMI <sup>1</sup>               | 0.0102  | 0.0249 | 0.410  | 0.682   | 1.010  | 0.962    | 1.061    |
| Body fat mass <sup>1</sup>     | 0.0097  | 0.0349 | 0.279  | 0.780   | 1.010  | 0.943    | 1.081    |
| Body weight <sup>1</sup>       | 0.0105  | 0.0152 | 0.693  | 0.488   | 1.011  | 0.981    | 1.041    |
| Systolic BP <sup>1</sup>       | 0.0065  | 0.0079 | 0.821  | 0.411   | 1.007  | 0.991    | 1.022    |
| Diastolic BP <sup>1</sup>      | 0.0109  | 0.0126 | 0.862  | 0.388   | 1.011  | 0.986    | 1.036    |
| Total cholesterol <sup>1</sup> | 0.0020  | 0.0041 | 0.484  | 0.628   | 1.002  | 0.994    | 1.010    |
| LDL-c <sup>1</sup>             | 0.0027  | 0.0049 | 0.554  | 0.580   | 1.003  | 0.993    | 1.012    |
| HDL-c <sup>1</sup>             | -0.0023 | 0.0164 | -0.142 | 0.887   | 0.998  | 0.966    | 1.030    |
| TG <sup>1</sup>                | 0.0024  | 0.0017 | 1.372  | 0.170   | 1.002  | 0.999    | 1.006    |
| HbA1c >7% <sup>1</sup>         | 3.3471  | 1.0257 | 3.263  | 0.001   | 28.420 | 3.807    | 212.193  |
| Female sex                     | 0.2374  | 0.3201 | 0.742  | 0.458   | 1.268  | 0.677    | 2.375    |
| Metformin                      | -1.2444 | 0.4480 | -2.778 | 0.005   | 0.288  | 0.120    | 0.693    |
| Sulphonylureas                 | -0.2761 | 0.3818 | -0.723 | 0.470   | 0.759  | 0.359    | 1.604    |
| Acarbose                       | -1.5159 | 0.7644 | -1.983 | 0.047   | 0.220  | 0.049    | 0.983    |
| Nateglinide                    | NA      | NA     | NA     | NA      | NA     | NA       | NA       |
| Pioglitazone                   | NA      | NA     | NA     | NA      | NA     | NA       | NA       |
| DPP-4i                         | 0.0746  | 0.3219 | 0.232  | 0.817   | 1.077  | 0.573    | 2.025    |
| Dapagliflozin                  | -0.1904 | 0.8513 | -0.224 | 0.823   | 0.827  | 0.156    | 4.385    |
| Insulin                        | 0.9093  | 0.3306 | 2.751  | 0.006   | 2.483  | 1.299    | 4.746    |
| Diuretic                       | 0.2523  | 0.3133 | 0.805  | 0.421   | 1.287  | 0.696    | 2.378    |
| ACE inhibitors                 | 0.0958  | 0.3639 | 0.263  | 0.792   | 1.101  | 0.539    | 2.246    |
| ARB                            | 0.1137  | 0.3095 | 0.367  | 0.713   | 1.120  | 0.611    | 2.055    |
| Alfa/Beta blockers             | 0.2418  | 0.3315 | 0.729  | 0.466   | 1.274  | 0.665    | 2.439    |
| Calcium channel blockers       | 0.6992  | 0.3168 | 2.207  | 0.027   | 2.012  | 1.082    | 3.744    |
| Aldosterone antagonists        | 1.0084  | 0.6896 | 1.462  | 0.144   | 2.741  | 0.710    | 10.591   |
| Renin inhibitors               | NA      | NA     | NA     | NA      | NA     | NA       | NA       |
| Statins                        | -0.0118 | 0.3535 | -0.033 | 0.973   | 0.988  | 0.494    | 1.976    |
| Fibrates                       | 0.2011  | 0.3876 | 0.519  | 0.604   | 1.223  | 0.572    | 2.614    |
| Ezetimibe                      | -0.2450 | 0.5505 | -0.445 | 0.656   | 0.783  | 0.266    | 2.303    |
| Dose adjustment <6 months      | -0.3943 | 0.3104 | -1.270 | 0.204   | 0.674  | 0.367    | 1.239    |

<sup>1</sup> Basal level. ACE; angiotensin-converting enzyme; ARB, angiotensin receptor blocker; BMI: body mass index; BP: blood pressure; DPP4i: Dipeptidyl-peptidase 4 inhibitors; HbA1c: glycated haemoglobin; HDL-c: high-density lipoprotein cholesterol; LDL-c: low-density lipoprotein cholesterol; TG: triglycerides;

**Table S3.** Multivariate analysis of factors predicting an HbA1c reduction of at least 1%.

| Predictors            | Beta    | SE     | z      | p-Value | OR     | LL-95%CI | UL-95%CI |
|-----------------------|---------|--------|--------|---------|--------|----------|----------|
| HbA1c basal level >7% | 3.3211  | 1.0294 | 3.226  | 0.001   | 27.691 | 3.682    | 208.237  |
| Metformin             | -1.1895 | 0.4862 | -2.446 | 0.014   | 0.304  | 0.117    | 0.789    |

**Table S4.** Number of patients (*n*/% ) who achieved 3% or 5% weight loss at different time points, when compared to baseline.

|                      | <b>6 months<br/>(<i>n</i>=184)</b> | <b>12 months<br/>(<i>n</i>=191)</b> | <b>24 months<br/>(<i>n</i>=136)</b> |
|----------------------|------------------------------------|-------------------------------------|-------------------------------------|
| Weight reduction ≥3% | 81 (44.0%)                         | 91 (47.6%)                          | 74 (54.4%)                          |
| Weight reduction ≥5% | 45 (24.5%)                         | 60 (31.4%)                          | 51 (37.5%)                          |
